# Supplementary material for: Real-time sampling of travelers shows intestinal colonization by multidrug-resistant bacteria to be a dynamic process with multiple transient acquisitions
Source: bioRxiv or medRxiv preprint supplement (doi:10.1101/827915), 2020-01-23
Supplement: Supplementary file [file media-1.pdf]

Table S1 – Frequencies of ESBL positive gram negative taxa observed in the dataset. *E. coli* and other Enterobacteriaceae (e.g. *Citrobacter*, *Klebsiella*) were the most common species observed. Some genera were isolated in very low numbers, (e.g. *Stenotrophomonas*, *Aeromonas*).

| Taxa                        | Number of Isolates |
|-----------------------------|--------------------|
| <i>E. coli</i>              | 219                |
| <i>Citrobacter</i>          | 28                 |
| <i>Klebsiella</i>           | 16                 |
| <i>Enterobacter cloacae</i> | 11                 |
| <i>Acinetobacter</i>        | 12                 |
| Other                       | 20                 |
| Total                       | 306                |

Figure S1 – Distribution of observed *E. coli* sequence types sorted by participant number and date. In some instances, there are clear single sequence types that longitudinally colonise a single participant (e.g. 1722, Participant 03). Other participants exhibit transient colonisation by multiple sequence types (e.g. Participant 33).

|                 |        | Participant Number |     |      |      |          |          |      |     |      |          |      |     |          |      |            |     |          |          |          |     |     |     |
|-----------------|--------|--------------------|-----|------|------|----------|----------|------|-----|------|----------|------|-----|----------|------|------------|-----|----------|----------|----------|-----|-----|-----|
|                 |        | 03                 | 04  | 05   | 06   | 08       | 09       | 11   | 12  | 13   | 16       | 17   | 18  | 19       | 21   | 23         | 26  | 33       | 34       | 35       | 36  | 40  |     |
| Collection Date | 19-Sep |                    |     |      |      |          |          |      |     |      |          |      |     |          |      |            |     | 34       |          |          |     |     |     |
|                 | 20-Sep |                    | 101 |      |      | 69       | 4682     |      |     |      |          |      |     |          |      | 5895       |     | 34       |          | 167      |     |     |     |
|                 | 21-Sep |                    |     |      |      | 69       | 1072     |      |     |      |          |      |     |          | 457  | 5895       |     | 34       | 1081     | 5848     |     |     |     |
|                 | 22-Sep |                    |     |      |      | 69       | 48 & 101 |      |     |      |          |      |     |          |      | 5895       |     |          | 167      | 167      |     | 195 |     |
|                 | 23-Sep | 195                | 101 |      |      | 69 & 195 | 48       |      | 394 |      |          |      |     | 101 & 34 |      |            |     | 34       |          | 34 & 101 |     | 195 |     |
|                 | 24-Sep |                    |     |      |      | 195      | 48       |      |     | 101  |          | 1638 |     |          | 457  | 5895       | 10  | 34 & 195 |          |          |     | 195 |     |
|                 | 25-Sep | 1722               |     |      | 3285 | 69       |          |      | 394 | 101  | 101      | 515  |     |          | 101  |            |     | 34 & 195 |          | 617      |     |     |     |
|                 | 26-Sep | 1722               |     |      |      | 69       |          |      |     | 101  | 101      |      |     |          | 34   |            |     |          |          | 617      | 101 |     |     |
|                 | 27-Sep | 1722               |     |      |      | 69       |          | 2067 | 69  |      |          |      | 410 |          | 3285 |            | 34  |          |          | 167      |     |     |     |
|                 | 28-Sep |                    |     | 1722 |      | 69       |          |      | 746 |      | 101      |      |     |          | 34   | 3285 & 101 | 542 |          | 34 & 195 | 167      |     | 101 | 48  |
|                 | 29-Sep | 1722               |     | 6856 |      |          |          | 2067 | 101 |      | 101      |      |     |          | 101  |            | 542 |          | 34 & 195 | 167      |     |     | 48  |
|                 | 30-Sep | 1722               |     | 38   |      |          |          | 2067 |     | 1722 | 38 & 101 |      |     |          | 34   | 101        | 457 |          |          | 34       |     | 101 | 48  |
|                 | 01-Oct | 1722               |     | 1722 |      |          |          | 2067 |     |      | 93 & 101 |      |     |          |      | 10         | 457 |          |          | 167      |     |     |     |
|                 | 02-Oct | 1722               |     |      |      | 6984     |          | 2067 |     | 38   | 93       | 515  |     |          | 34   | 10         | 457 |          | 195      | 34 & 195 |     | 398 | 195 |
|                 | 03-Oct | 1722               |     |      |      | 6984     |          | 2067 |     | 38   | 93       | 542  |     |          | 34   | 3285       | 457 |          | 515      | 34       |     |     |     |
|                 | 04-Oct | 1722               |     |      | 515  | 69       |          | 2067 |     |      | 38       |      |     |          |      | 10         | 457 |          |          | 34 & 195 |     |     | 40  |
|                 | 05-Oct | 1722               |     | 542  |      |          |          | 2067 |     |      | 101      |      |     |          |      |            |     |          | 515      | 167      |     |     | 38  |
|                 | 06-Oct |                    |     |      |      |          |          | 2067 |     |      | 93       |      |     |          |      | 457        | 457 |          |          | 167      |     |     | 38  |
|                 | 07-Oct | 1722               |     |      |      |          |          | 2067 |     |      |          |      |     |          |      | 69         | 457 |          | 195      | 34       |     |     | 38  |
|                 | 08-Oct | 1722               |     | 515  |      |          |          | 2067 |     |      |          |      |     |          |      |            | 457 |          | 38       | 34 & 195 |     |     | 38  |
| 09-Oct          |        |                    |     |      |      |          |          |      |     |      |          |      |     |          |      |            |     |          | 34       |          |     |     |     |

Figure S2 – Phylogeny of *E. coli* isolates shown with presence of observed beta-lactamase genes. The majority of isolates carried at least one type of CTX-M, and an alarming amount of isolates also carried colistin resistance gene MCR. Some less common beta-lactamase genes were also observed (e.g. ACT, ADC). Purple = gene present, orange = gene absent.

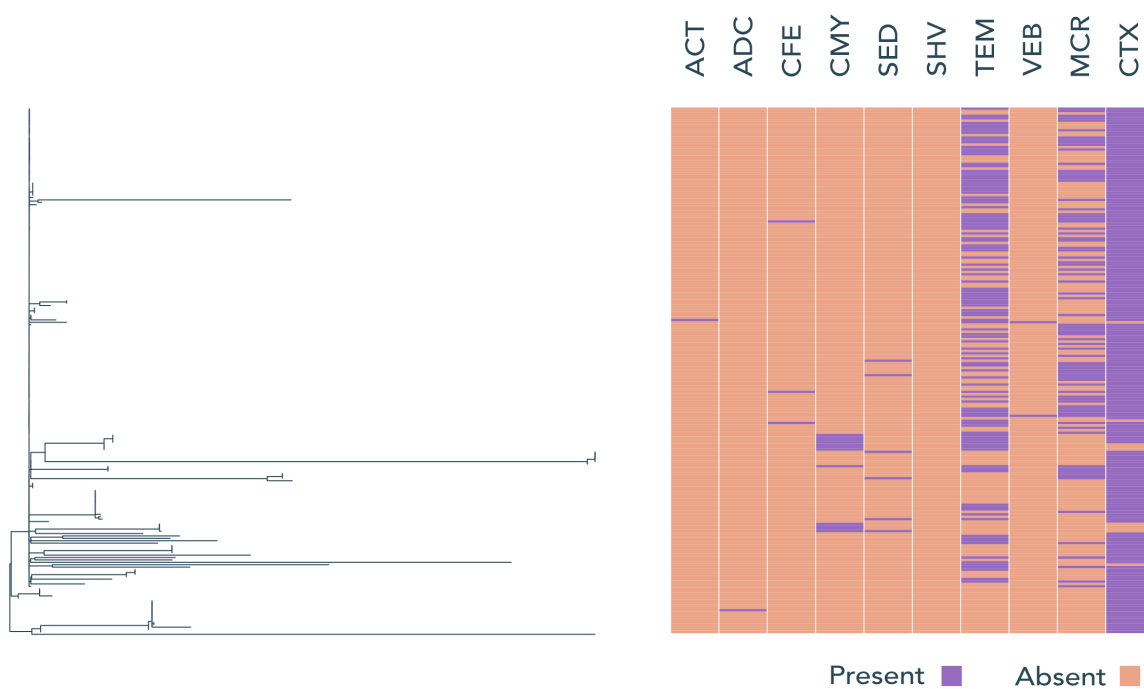

Table S2 – Total frequencies at which CTX-M subtypes were observed amongst the dataset. CTX-M-55 was the most common type observed, with other CTX-M types that are typically more dominant in other parts of the world (e.g. CTX-M-15) found to be less abundant.

| CTX-M Type | Number of Isolates with CTX-M Present |
|------------|---------------------------------------|
| CTX-M-55   | 64                                    |
| CTX-M-14   | 58                                    |
| CTX-M-159  | 57                                    |
| CTX-M-15   | 30                                    |
| CTX-M-102  | 25                                    |
| CTX-M-40   | 2                                     |
| CTX-M-63   | 2                                     |
| CTX-M-164  | 1                                     |
| CTX-M-181  | 1                                     |
| CTX-M-196  | 1                                     |
| CTX-M-32   | 1                                     |
| CTX-M-65   | 1                                     |
| CTX-M-76   | 1                                     |
| CTX-M-77   | 1                                     |
